# Supplementary material for: Complete Genome Sequence of Pantoea stewartii RON18713 from Brazil Nut Tree Phyllosphere Reveals Genes Involved in Plant Growth Promotion
Source: MDPI journal article supplement (doi:10.3390/microorganisms11071729), 2023-06-30
Supplement: s1 [file s1]

# Supplementary material

## S1. Average nucleotide identity (ANI) comparisons

The NCBI accession numbers of the genome assemblies used to calculate the ANI score against RON18713 chromosome in Figure 1A of the paper.

| NCBI Accession  | Organism Name                             |
|-----------------|-------------------------------------------|
| GCA_000005845.2 | Escherichia coli str. K-12 substr. MG1655 |
| GCA_000008865.2 | Escherichia coli O157:H7 str. Sakai       |
| GCA_003697165.2 | Escherichia coli ATCC 11775               |
| GCA_003018455.1 | Escherichia coli                          |
| GCA_024300685.1 | Escherichia coli                          |
| GCA_027925825.1 | Escherichia coli                          |
| GCA_003018035.1 | Escherichia coli                          |
| GCA_027925745.1 | Escherichia coli                          |
| GCA_027925805.1 | Escherichia coli                          |
| GCA_027925765.1 | Escherichia coli                          |
| GCA_000091565.1 | Erwinia amylovora CFBP1430                |
| GCA_017161565.1 | Erwinia amylovora                         |
| GCA_015650045.1 | Erwinia amylovora                         |
| GCA_002803865.1 | Erwinia amylovora                         |
| GCA_027557715.1 | Erwinia amylovora                         |
| GCA_012980785.1 | Erwinia amylovora                         |
| GCA_012980845.1 | Erwinia amylovora                         |
| GCA_017161545.1 | Erwinia amylovora                         |
| GCA_012980825.1 | Erwinia amylovora                         |
| GCA_023612715.1 | Erwinia amylovora                         |
| GCA_019048385.1 | Pantoea agglomerans                       |
| GCA_943184895.1 | Pantoea agglomerans                       |
| GCA_021397715.1 | Pantoea agglomerans                       |
| GCA_001709315.1 | Pantoea agglomerans                       |
| GCA_017474165.1 | Pantoea agglomerans                       |
| GCA_021559955.1 | Pantoea agglomerans                       |
| GCA_029016125.1 | Pantoea agglomerans                       |

| NCBI Accession  | Organism Name                                             |
|-----------------|-----------------------------------------------------------|
| GCA_003704305.1 | <i>Pantoea agglomerans</i>                                |
| GCA_022966105.1 | <i>Pantoea agglomerans</i>                                |
| GCA_020783495.1 | <i>Pantoea agglomerans</i>                                |
| GCA_000233595.1 | <i>Pantoea ananatis</i> PA13                              |
| GCA_004028255.1 | <i>Pantoea ananatis</i>                                   |
| GCA_025765855.1 | <i>Pantoea ananatis</i>                                   |
| GCA_013364135.1 | <i>Pantoea ananatis</i>                                   |
| GCA_023845475.1 | <i>Pantoea ananatis</i>                                   |
| GCA_002224585.2 | <i>Pantoea ananatis</i>                                   |
| GCA_026075575.1 | <i>Pantoea ananatis</i>                                   |
| GCA_023611845.1 | <i>Pantoea ananatis</i>                                   |
| GCA_002952035.2 | <i>Pantoea ananatis</i>                                   |
| GCA_001543055.1 | <i>Pantoea ananatis</i>                                   |
| GCA_011044475.1 | <i>Pantoea stewartii</i>                                  |
| GCA_025765915.1 | <i>Pantoea stewartii</i>                                  |
| GCA_002082215.1 | <i>Pantoea stewartii</i> subsp. <i>stewartii</i><br>DC283 |
| GCA_000757405.2 | <i>Pantoea stewartii</i> subsp.<br><i>indologenes</i>     |
| GCA_008801695.1 | <i>Pantoea stewartii</i> subsp. <i>stewartii</i>          |
| GCA_029433915.1 | <i>Pantoea stewartii</i>                                  |
| GCA_001310285.1 | <i>Pantoea stewartii</i>                                  |
| GCA_013277595.1 | <i>Pantoea stewartii</i>                                  |
| GCA_025599245.1 | <i>Pantoea stewartii</i>                                  |
| GCA_014218605.1 | <i>Pantoea stewartii</i>                                  |

## S2. Electronic PCR for *P. stewartii* subspecies differentiation

To distinguish between *P. stewartii* subspecies, Pal et al. (2019) designed primer pairs targeting the intergenic region of the *cpsA* and *cpsB* genes, that are contained in the Stewartan biosynthesis operon (*wce-I*). The primer pair *cpsF* (forward) and *cpsR* (reverse) can amplify this region in *P. stewartii* regardless of its subspecies. However, a 182 bp deletion was found in the *indologenes* subspecies, resulting in an expected amplicon size of 193 bp. In contrast, for the *stewartii* subspecies, the expected amplicon size is 375 bp.

The authors designed another forward primer (*cpsAB2313F*) annealing at the divergent region to further differentiate the subspecies. When used together with *cpsR*, this primer is not expected to generate a PCR product for the *indologenes* subspecies. In contrast, a PCR product of 193 bp is expected for the *stewartii* subspecies. The primer sequences are:

|                   |                      |
|-------------------|----------------------|
| <i>cpsF</i>       | AAGGTGCCAGCCTCTCTCTG |
| <i>cpsAB2313F</i> | AGAAAACGCTGATGCCAGAC |
| <i>cpsR</i>       | ACTATCCTGACTCAGGCACT |

Pal, N., Block, C. C., & Gardner, C. A. C. (2019). A Real-Time PCR Differentiating *Pantoea stewartii* subsp. *stewartii* From *P. stewartii* subsp. *indologenes* in Corn Seed. Plant disease, 103(7), 1474–1486. <https://doi.org/10.1094/PDIS-06-18-0936-RE>

To distinguish between the subspecies in various *P. stewartii* strains, we conducted an electronic PCR (ePCR) analysis using the *cpsF*-*cpsR* and *cpsAB2313F*-*cpsR* primer pair combinations. We used NCBI genomes as templates and included type strains for both subspecies (LMG 2632=*indologenes* and CCUG 26359=*stewartii*). The table below displays the ePCR results obtained from the primersearch program of the EMBOSS package. The expected amplicon sizes described above were used to diagnose the subspecies.

| Strain     | Accession       | Subspecies  | Amplicon            |                           | Diagnostics |
|------------|-----------------|-------------|---------------------|---------------------------|-------------|
|            |                 |             | <i>cpsF</i><br>(bp) | <i>cpsAB2313F</i><br>(bp) |             |
| RON18719   | CP116285        | unassigned  | 193                 | 0                         | indologenes |
| A206       | NZ_LIHC01000006 | unassigned  | 193                 | 0                         | indologenes |
| ZJ-FGZX1   | NZ_CP049115     | indologenes | 193                 | 0                         | indologenes |
| LMG 2632   | NZ_JPKO01000031 | indologenes | 193                 | 0                         | indologenes |
| DC283      | NZ_CP017581     | stewartii   | 375                 | 256                       | stewartii   |
| CCUG 26359 | NZ_VZPF01000032 | stewartii   | 375                 | 256                       | stewartii   |

The primersearch results are shown below.

- *Pantoea stewartii* strain RON18719

```

Primer name cpsF-cpsR
Amplimer 1
  Sequence: CP116285
  Pantoea stewartii strain RON18719, chromosome
  AAGGTGCCAGCCTCTCTCTG hits forward strand at 3300577 with 0
mismatches
  ACTATCCTGACTCAGGCACT hits reverse strand at [1033725] with
0 mismatches
  Amplimer length: 193 bp

Primer name cpsAB2313F-cpsR
Amplimer length: 0 bp

```

- *Pantoea stewartii* strain A206

```

Primer name cpsF-cpsR
Amplimer 1
  Sequence: NZ_LIHC01000006 NZ_LIHC01000006
  Pantoea stewartii strain A206 scaffold2.1, whole genome
shotgun sequence.
  AAGGTGCCAGCCTCTCTCTG hits forward strand at 486043 with 0
mismatches
  ACTATCCTGACTCAGGCACT hits reverse strand at [256853] with 0
mismatches
  Amplimer length: 193 bp

Primer name cpsAB2313F-cpsR
Amplimer length: 0 bp

```

- *Pantoea stewartii* strain ZJ-FGZX1

```

Primer name cpsF-cpsR
Amplimer 1
  Sequence: NZ_CP049115 NZ_CP049115
  Pantoea stewartii strain ZJ-FGZX1 chromosome, complete genome.
  ACTATCCTGACTCAGGCACT hits forward strand at 1196988 with 0
mismatches
  AAGGTGCCAGCCTCTCTCTG hits reverse strand at [3352893] with 0
mismatches
  Amplimer length: 193 bp

Primer name cpsAB2313F-cpsR
Amplimer length: 0 bp

```

- *Pantoea stewartii* subsp. *indologenes* strain LMG 2632

```
Primer name cpsF-cpsR
Amplimer 1
Sequence: NZ_JPK001000031.1
Pantoea stewartii subsp. indologenes strain LMG 2632
Contig31, whole genome shotgun sequence
ACTATCCTGACTCAGGCACT hits forward strand at 139980 with 0
mismatches
AAGGTGCCAGCCTCTCTCTG hits reverse strand at [454151] with 0
mismatches
Amplimer length: 193 bp

Primer name cpsAB2313F-cpsR
Amplimer length: 0 bp
```

- *Pantoea stewartii* subsp. *stewartii* DC283

```
Primer name cpsF-cpsR
Amplimer 1
Sequence: NZ_CP017581 NZ_CP017581
Pantoea stewartii subsp. stewartii DC283 chromosome,
complete genome.
ACTATCCTGACTCAGGCACT hits forward strand at 3252402 with 0
mismatches
AAGGTGCCAGCCTCTCTCTG hits reverse strand at [1275440] with
0 mismatches
Amplimer length: 375 bp

Primer name cpsAB2313F-cpsR
Amplimer 1
Sequence: NZ_CP017581 NZ_CP017581
Pantoea stewartii subsp. stewartii DC283 chromosome,
complete genome.
ACTATCCTGACTCAGGCACT hits forward strand at 3252402 with 0
mismatches
AGAAAACGCTGATGCCAGAC hits reverse strand at [1275559] with
0 mismatches
Amplimer length: 256 bp
```

- *Pantoea stewartii* subsp. *stewartii* strain CCUG 26359

```
Primer name cpsF-cpsR
Amplimer 1
Sequence: NZ_VZPF01000032.1
Pantoea stewartii subsp. stewartii strain CCUG 26359
contig_0000032, whole genome shotgun sequence
AAGGTGCCAGCCTCTCTCTG hits forward strand at 32986 with 0
mismatches
ACTATCCTGACTCAGGCACT hits reverse strand at [18045] with 0
mismatches
Amplimer length: 375 bp
```

Primer name cpsAB2313F-cpsR  
Amplimer 1  
Sequence: NZ\_VZPF01000032.1  
Pantoea stewartii subsp. stewartii strain CCUG 26359  
contig\_0000032, whole genome shotgun sequence  
AGAAAACGCTGATGCCAGAC hits forward strand at 33105 with 0  
mismatches  
ACTATCCTGACTCAGGCACT hits reverse strand at [18045] with 0  
mismatches  
Amplimer length: 256 bp

### S3. RON18713 plasmid map

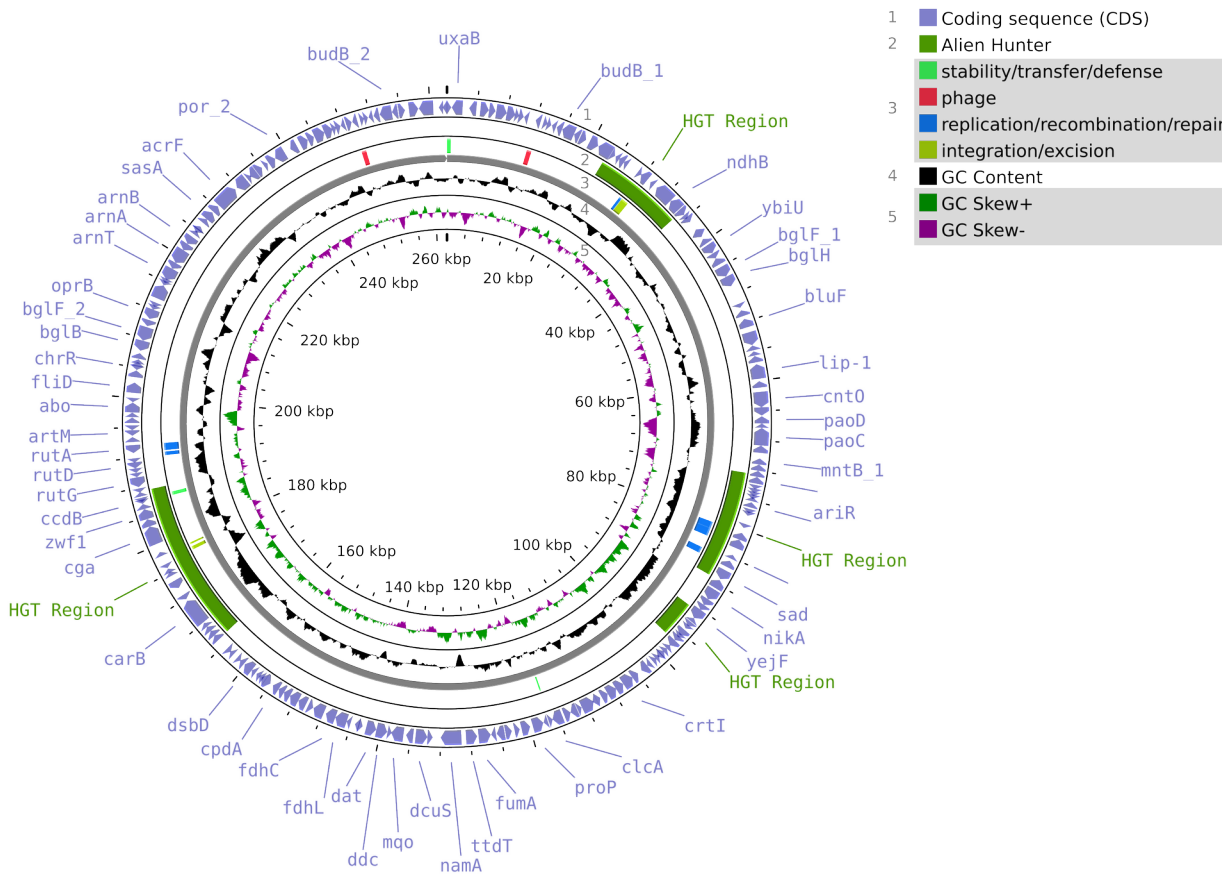

*P. stewartii* RON18713 plasmid

Figure S1 - Circular representation of *P. stewartii* RON18713 assembled plasmid (GenBank: CP116286) generated by Proksee server (<https://proksee.ca>). Rings indicate the annotated coding sequences (CDS), horizontal gene transfer (HGT) events using Alien Hunter, mobile genetic elements (MGEs) using mobileOG-db (beatrix-1.6), GC content and GC skew. All annotations, except for the CDS were performed by Proksee's embedded analytical tools.
